# Supplementary material
Source: HighWire-hosted journal article supplement (https://bmjopen.bmj.com/content/11/1/e040302)
Supplement: inline-supplementary-material-1 [file inline-supplementary-material-1.pdf]

**SUPPLEMENTARY FILE****Changing patterns of gender inequities in childhood mortalities during the Sustainable Development Goals era in Nigeria: findings from an artificial neural network analysis**

*Running title: Gender inequity in childhood mortality in Nigeria*

Daniel Adedayo Adeyinka (ORCID: 0000-0003-1855-6878)<sup>1,2\*</sup>, Pammla Petruka (ORCID: 0000-0003-3174-3328)<sup>3</sup>, Elon Warnow Isaac (ORCID: 0000-0002-9754-4615)<sup>4</sup>, Nazeem Muhajarine (ORCID: 0000-0001-6781-5421)<sup>1,5</sup>

<sup>1</sup>Department of Community Health and Epidemiology, College of Medicine, University of Saskatchewan, Canada

<sup>2</sup>Department of Public Health, Federal Ministry of Health, Abuja, Nigeria

<sup>3</sup>College of Nursing, University of Saskatchewan, Canada

<sup>4</sup>Department of Paediatrics, College of Medical Sciences, Gombe State University, Nigeria

<sup>5</sup>Saskatchewan Population Health and Evaluation Research Unit, Saskatchewan, Canada

\*Corresponding author: Tel: +13068500086

E-mail address: daa929@usask.ca (DA Adeyinka)

Supplementary Table S1: Projected under-five and neonatal mortality rates for Nigeria, 2018-2030

(obtained using GMDH-type Artificial Neural Network analysis)

| Year            | Under-five mortality rate (per 1000 live births)<br>(95% prediction interval) |                     |                  | Neonatal mortality rate (per<br>1000 live births)<br>(95% prediction interval) |
|-----------------|-------------------------------------------------------------------------------|---------------------|------------------|--------------------------------------------------------------------------------|
|                 | Overall                                                                       | Male                | Female           | Overall                                                                        |
| 2018            | 96.9 (96.7-97.1)                                                              | 102.3 (101.9-102.6) | 90.7 (90.5-90.8) | 32.3 (32.1-32.4)                                                               |
| 2019            | 93.4 (93.2-93.6)                                                              | 98.4 (98.0-98.7)    | 87.7 (87.6-87.9) | 31.7 (31.5-31.8)                                                               |
| 2020            | 89.7 (89.5-89.9)                                                              | 94.4 (94.1-94.6)    | 85.0 (84.9-85.2) | 31.1 (31.0-31.3)                                                               |
| 2021            | 86.6 (86.4-86.8)                                                              | 90.5 (90.1-90.8)    | 82.6 (82.4-82.7) | 30.6 (30.4-30.7)                                                               |
| 2022            | 83.2 (83.0-83.4)                                                              | 86.1 (85.7-86.4)    | 80.2 (80.1-80.4) | 30.1 (29.9-30.3)                                                               |
| 2023            | 79.5 (79.3-79.7)                                                              | 82.5 (82.1-82.8)    | 78.3 (78.1-78.4) | 29.1 (28.9-29.3)                                                               |
| 2024            | 78.7 (78.5-78.2)                                                              | 79.2 (78.8-79.5)    | 76.6 (76.4-76.7) | 29.4 (29.2-29.6)                                                               |
| 2025            | 76.0 (75.8-76.2)                                                              | 74.0 (73.6-74.3)    | 75.5 (75.4-75.6) | 28.2 (28.0-28.4)                                                               |
| 2026            | 77.1 (76.9-77.3)                                                              | 68.3 (68.0-68.7)    | 75.1 (74.9-75.2) | 27.5 (27.3-27.7)                                                               |
| 2027            | 73.5 (73.3-73.6)                                                              | 62.4 (62.1-62.8)    | 75.6 (75.5-75.8) | 21.9 (21.8-22.1)                                                               |
| 2028            | 58.2 (58.0-58.4)                                                              | 59.9 (59.6-60.3)    | 76.4 (76.3-76.6) | 22.6 (22.4-22.8)                                                               |
| 2029            | 72.4 (72.2-72.5)                                                              | 54.2 (53.9-54.6)    | 80.5 (80.4-80.7) | 30.7 (30.5-30.9)                                                               |
| 2030            | 85.9 (85.7-86.1)                                                              | 62.6 (62.2-62.9)    | 80.9 (80.7-81.0) | 25.3 (25.1-25.5)                                                               |
| <b>RMSE</b>     | 0.09                                                                          | 0.17                | 0.07             | 0.09                                                                           |
| <b>MAE</b>      | 0.06                                                                          | 0.14                | 0.05             | 0.07                                                                           |
| <b>Accuracy</b> | 93.9%                                                                         | 81.3%               | 93.8%            | 100%                                                                           |

RMSE: root mean squared errors, MAE: mean absolute errors

Supplementary Table S2: Projected relative and absolute gender inequities of under-five mortality rates,

Nigeria

| Year | Relative inequity (Male: Female) | Absolute inequity (Male-Female) |
|------|----------------------------------|---------------------------------|
| 2018 | 1.13                             | 11.59                           |
| 2019 | 1.12                             | 10.67                           |
| 2020 | 1.11                             | 9.42                            |
| 2021 | 1.10                             | 7.89                            |
| 2022 | 1.07                             | 5.82                            |
| 2023 | 1.05                             | 4.20                            |
| 2024 | 1.03                             | 2.63                            |
| 2025 | 0.98                             | -1.54                           |
| 2026 | 0.91                             | -6.77                           |
| 2027 | 0.83                             | -13.24                          |
| 2028 | 0.78                             | -16.52                          |
| 2029 | 0.67                             | -26.30                          |
| 2030 | 0.77                             | -18.32                          |

Supplementary Figure S1: Historical under-five mortality rates (U5MR) (1964-2017) and neonatal mortality rate (NMR) (1967-2017), Nigeria

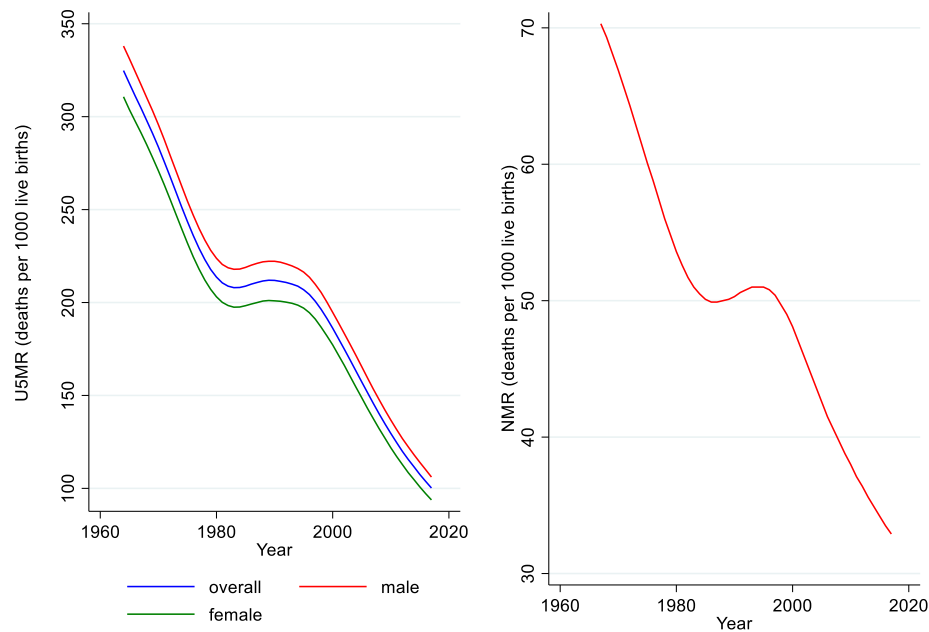

Supplementary Figure S2: Out-of-sample GMDH-type ANN mortality forecasting for Nigeria, 2018-2030

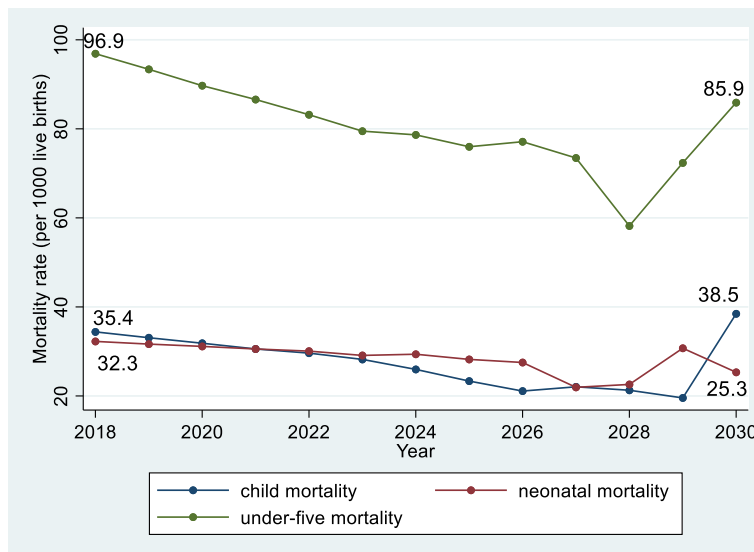

Neonatal (0-27 days), child (1-4 years), and under-five (0-4 years)

Supplementary Figure S3: Agreement between projected sex-ratios of GMDH-type ANN and ARIMA

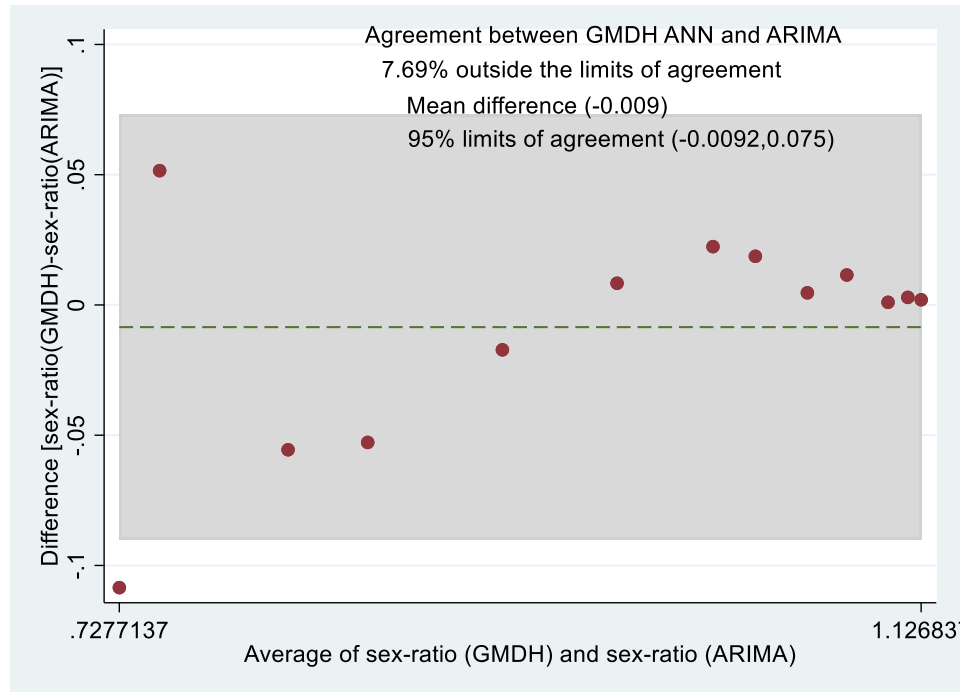

With wide 95% limits of agreement and 7.69% outside limits of agreement, there is evidence of low proportional bias.
